# Supplementary material
Source: publisher site journal article supplement (https://www.dovepress.com/article/272986)
Supplement: Supplementary file 1 [file get_supplementary_file.php]

**Supplementary Material**

**Supplementary Table 1.** Predictors of participants’ dental visits

| Variable | Never visit a dentist  N = 90 | Ever visit a dentist  N = 962 | Multivariate  OR (95% CI) |
| --- | --- | --- | --- |
| Faculty |  |  |  |
| Medical | 19 | 293 | 1.00 |
| Non-medical | 71 | 669 | 0.7 (0.4 - 1.2) |
| Age |  |  |  |
| ≤22 years | 55 | 624 | 1.00 |
| >22 years | 35 | 338 | 1.0 (0.6-1.6) |
| Gender |  |  |  |
| Male | 62 | 366 | 1.00 |
| Female | 28 | 596 | 3.6 (2.2 - 5.8) |
| Father’s education level |  |  |  |
| Less than university | 49 | 458 | 1.00 |
| University | 41 | 504 | 1.2 (0.8 - 2.0) |
| Mother’s education level |  |  |  |
| Less than university | 55 | 594 | 1.00 |
| University | 35 | 368 | 0.7 (0.4 - 1.2) |
| Income (SAR/month) |  |  |  |
| ≤10,000 | 41 | 341 | 1.00 |
| >10,000 | 49 | 621 | 1.6 (1.0 - 2.5) |

CI = confidence interval; OR = odds ratio; SAR = Saudi Arabian Riyal.

**Supplementary Table 2.** Predictors of oral hygiene behavior

| Variable | Tooth brushing less than twice daily  N = 437 | Tooth brushing twice daily or more  N = 615 | Multivariate  OR (95% CI) |
| --- | --- | --- | --- |
| Faculty |  |  |  |
| Medical | 107 | 205 | 1.00 |
| Non-medical | 330 | 410 | 0.8 (0.6 - 1.1) |
| Age |  |  |  |
| ≤22 years | 276 | 403 | 1.00 |
| >22 years | 161 | 212 | 1.1 (0.9 - 1.5) |
| Gender |  |  |  |
| Male | 267 | 161 | 1.00 |
| Female | 170 | 454 | 4.5 (3.4 - 5.9) |
| Father’s education level |  |  |  |
| Less than university | 228 | 280 | 1.00 |
| University | 209 | 335 | 1.2 (0.9 - 1.6) |
| Mother’s education level |  |  |  |
| Less than university | 288 | 362 | 1.00 |
| University | 149 | 253 | 1.2 (0.9 - 1.6) |
| Income (SAR/month) |  |  |  |
| ≤10,000 | 173 | 209 | 1.00 |
| >10,000 | 264 | 406 | 1.2 (0.9 - 1.6) |

CI = confidence interval; OR = odds ratio; SAR = Saudi Arabian Riyal.
